# Supplementary material
Source: publisher figshare collection journal article supplement (https://tandf.figshare.com/ndownloader/files/17483033)
Supplement: Supplementary file 1 [file 17483033]

## Sheet: Sheet1
		Interest in science					Valuing scientific approaches to enquiry						Environmental awareness							Explain phenomena scientifically										Evaluate and design scientific enquiry										Interpret data and evidence scientifically
		1	2	3	4	5	1	2	3	4	5	6	1	2	3	4	5	6	7	1	2	3	4	5	6	7	8	9	10	1	2	3	4	5	6	7	8	9	10	1	2	3	4	5	6	7	8	9	10
Interest in science	1	1	.755**	.735**	.764**	.770**	.257**	.237**	.262**	.233**	.232**	.219**	.279**	.191**	.173**	.234**	.233**	.209**	.213**	.220**	.224**	.223**	.230**	.225**	.224**	.225**	.221**	.223**	.221**	.200**	.192**	.188**	.192**	.189**	.192**	.203**	.179**	.196**	.186**	.209**	.203**	.210**	.199**	.196**	.204**	.206**	.207**	.210**	.199**
	2	.755**	1	.808**	.808**	.813**	.245**	.217**	.247**	.214**	.215**	.208**	.288**	.197**	.172**	.234**	.228**	.205**	.219**	.239**	.241**	.240**	.250**	.242**	.242**	.243**	.241**	.242**	.236**	.206**	.202**	.193**	.204**	.195**	.197**	.208**	.194**	.202**	.195**	.216**	.214**	.217**	.208**	.206**	.213**	.215**	.219**	.222**	.208**
	3	.735**	.808**	1	.790**	.799**	.234**	.208**	.223**	.212**	.211**	.200**	.261**	.203**	.179**	.201**	.201**	.190**	.199**	.195**	.196**	.196**	.206**	.198**	.199**	.199**	.197**	.200**	.190**	.161**	.156**	.152**	.159**	.150**	.155**	.167**	.149**	.159**	.147**	.175**	.168**	.177**	.165**	.163**	.172**	.174**	.176**	.179**	.164**
	4	.764**	.808**	.790**	1	.849**	.252**	.244**	.269**	.239**	.236**	.223**	.289**	.197**	.174**	.242**	.239**	.211**	.210**	.254**	.259**	.255**	.264**	.258**	.259**	.258**	.258**	.259**	.253**	.229**	.225**	.215**	.223**	.216**	.219**	.229**	.212**	.227**	.218**	.240**	.236**	.241**	.228**	.226**	.237**	.237**	.240**	.243**	.229**
	5	.770**	.813**	.799**	.849**	1	.239**	.217**	.246**	.221**	.217**	.202**	.277**	.186**	.168**	.223**	.225**	.202**	.200**	.234**	.236**	.236**	.243**	.235**	.237**	.237**	.235**	.236**	.230**	.206**	.200**	.192**	.202**	.191**	.196**	.207**	.190**	.201**	.195**	.215**	.210**	.216**	.204**	.202**	.212**	.214**	.215**	.218**	.206**
Valuing scientific approaches to enquiry	1	.257**	.245**	.234**	.252**	.239**	1	.531**	.626**	.565**	.511**	.481**	.205**	.116**	.118**	.188**	.181**	.155**	.170**	.223**	.227**	.224**	.227**	.227**	.223**	.227**	.224**	.229**	.229**	.226**	.223**	.217**	.221**	.220**	.228**	.220**	.223**	.221**	.216**	.228**	.219**	.222**	.216**	.216**	.220**	.225**	.213**	.225**	.219**
	2	.237**	.217**	.208**	.244**	.217**	.531**	1	.628**	.565**	.669**	.696**	.218**	.193**	.206**	.174**	.159**	.162**	.146**	.251**	.256**	.250**	.254**	.258**	.250**	.250**	.251**	.251**	.251**	.239**	.238**	.233**	.233**	.236**	.235**	.232**	.234**	.230**	.225**	.243**	.242**	.244**	.238**	.238**	.243**	.252**	.237**	.247**	.236**
	3	.262**	.247**	.223**	.269**	.246**	.626**	.628**	1	.683**	.610**	.580**	.248**	.161**	.159**	.235**	.216**	.179**	.194**	.308**	.316**	.312**	.312**	.316**	.308**	.313**	.311**	.315**	.314**	.317**	.309**	.305**	.304**	.305**	.311**	.304**	.306**	.306**	.304**	.316**	.310**	.312**	.306**	.305**	.308**	.314**	.305**	.314**	.310**
	4	.233**	.214**	.212**	.239**	.221**	.565**	.565**	.683**	1	.601**	.556**	.220**	.159**	.168**	.203**	.196**	.167**	.164**	.250**	.257**	.253**	.254**	.260**	.251**	.256**	.253**	.257**	.253**	.259**	.251**	.245**	.248**	.246**	.250**	.251**	.247**	.247**	.243**	.252**	.251**	.247**	.245**	.245**	.247**	.255**	.241**	.252**	.246**
	5	.232**	.215**	.211**	.236**	.217**	.511**	.669**	.610**	.601**	1	.709**	.201**	.187**	.192**	.168**	.164**	.163**	.150**	.211**	.218**	.211**	.220**	.219**	.211**	.211**	.212**	.215**	.216**	.205**	.202**	.196**	.194**	.196**	.197**	.196**	.197**	.197**	.188**	.208**	.207**	.206**	.198**	.200**	.204**	.214**	.201**	.210**	.201**
	6	.219**	.208**	.200**	.223**	.202**	.481**	.696**	.580**	.556**	.709**	1	.200**	.192**	.195**	.160**	.150**	.155**	.147**	.212**	.219**	.211**	.218**	.215**	.211**	.211**	.214**	.216**	.214**	.204**	.205**	.199**	.197**	.199**	.200**	.197**	.201**	.198**	.190**	.206**	.209**	.205**	.201**	.195**	.205**	.211**	.200**	.210**	.200**
Environmental awareness	1	.279**	.288**	.261**	.289**	.277**	.205**	.218**	.248**	.220**	.201**	.200**	1	.445**	.461**	.556**	.521**	.449**	.456**	.438**	.438**	.432**	.437**	.437**	.437**	.441**	.437**	.439**	.436**	.398**	.394**	.391**	.391**	.397**	.396**	.405**	.387**	.396**	.390**	.414**	.413**	.416**	.408**	.412**	.417**	.414**	.417**	.415**	.410**
	2	.191**	.197**	.203**	.197**	.186**	.116**	.193**	.161**	.159**	.187**	.192**	.445**	1	.538**	.340**	.295**	.346**	.328**	.222**	.221**	.215**	.222**	.221**	.222**	.224**	.222**	.219**	.221**	.173**	.168**	.168**	.162**	.166**	.168**	.175**	.163**	.169**	.164**	.187**	.182**	.192**	.182**	.190**	.187**	.191**	.184**	.190**	.182**
	3	.173**	.172**	.179**	.174**	.168**	.118**	.206**	.159**	.168**	.192**	.195**	.461**	.538**	1	.385**	.348**	.393**	.345**	.199**	.202**	.194**	.205**	.198**	.200**	.208**	.200**	.200**	.204**	.146**	.140**	.145**	.133**	.144**	.135**	.153**	.139**	.140**	.142**	.157**	.160**	.167**	.160**	.161**	.161**	.167**	.166**	.162**	.156**
	4	.234**	.234**	.201**	.242**	.223**	.188**	.174**	.235**	.203**	.168**	.160**	.556**	.340**	.385**	1	.730**	.633**	.636**	.301**	.297**	.298**	.300**	.300**	.301**	.307**	.299**	.305**	.303**	.284**	.281**	.271**	.277**	.280**	.276**	.290**	.271**	.279**	.277**	.285**	.284**	.287**	.278**	.283**	.290**	.286**	.287**	.283**	.281**
	5	.233**	.228**	.201**	.239**	.225**	.181**	.159**	.216**	.196**	.164**	.150**	.521**	.295**	.348**	.730**	1	.705**	.711**	.243**	.239**	.241**	.245**	.242**	.246**	.251**	.245**	.248**	.245**	.230**	.231**	.221**	.228**	.225**	.229**	.240**	.221**	.231**	.229**	.232**	.230**	.236**	.229**	.232**	.240**	.234**	.236**	.230**	.231**
	6	.209**	.205**	.190**	.211**	.202**	.155**	.162**	.179**	.167**	.163**	.155**	.449**	.346**	.393**	.633**	.705**	1	.694**	.184**	.180**	.181**	.186**	.184**	.188**	.191**	.183**	.185**	.187**	.163**	.164**	.157**	.153**	.158**	.162**	.174**	.155**	.161**	.160**	.168**	.165**	.174**	.164**	.168**	.175**	.171**	.172**	.167**	.166**
	7	.213**	.219**	.199**	.210**	.200**	.170**	.146**	.194**	.164**	.150**	.147**	.456**	.328**	.345**	.636**	.711**	.694**	1	.206**	.205**	.203**	.208**	.205**	.207**	.212**	.207**	.213**	.211**	.185**	.188**	.179**	.183**	.179**	.185**	.194**	.179**	.191**	.181**	.192**	.192**	.198**	.188**	.189**	.198**	.193**	.197**	.193**	.193**
Explain phenomena scientifically	1	.220**	.239**	.195**	.254**	.234**	.223**	.251**	.308**	.250**	.211**	.212**	.438**	.222**	.199**	.301**	.243**	.184**	.206**	1	.899**	.896**	.899**	.898**	.899**	.897**	.898**	.899**	.895**	.901**	.843**	.838**	.839**	.842**	.838**	.841**	.842**	.845**	.839**	.923**	.862**	.864**	.862**	.867**	.863**	.864**	.860**	.865**	.861**
	2	.224**	.241**	.196**	.259**	.236**	.227**	.256**	.316**	.257**	.218**	.219**	.438**	.221**	.202**	.297**	.239**	.180**	.205**	.899**	1	.897**	.898**	.899**	.898**	.897**	.900**	.898**	.898**	.846**	.906**	.843**	.843**	.843**	.844**	.844**	.843**	.847**	.841**	.864**	.922**	.864**	.863**	.865**	.862**	.864**	.862**	.864**	.862**
	3	.223**	.240**	.196**	.255**	.236**	.224**	.250**	.312**	.253**	.211**	.211**	.432**	.215**	.194**	.298**	.241**	.181**	.203**	.896**	.897**	1	.898**	.899**	.897**	.897**	.900**	.898**	.898**	.843**	.844**	.901**	.843**	.844**	.841**	.845**	.845**	.847**	.841**	.862**	.862**	.927**	.862**	.865**	.862**	.866**	.862**	.864**	.863**
	4	.230**	.250**	.206**	.264**	.243**	.227**	.254**	.312**	.254**	.220**	.218**	.437**	.222**	.205**	.300**	.245**	.186**	.208**	.899**	.898**	.898**	1	.901**	.898**	.898**	.899**	.899**	.896**	.843**	.843**	.841**	.899**	.840**	.842**	.844**	.841**	.845**	.837**	.862**	.864**	.865**	.922**	.866**	.861**	.866**	.863**	.864**	.862**
	5	.225**	.242**	.198**	.258**	.235**	.227**	.258**	.316**	.260**	.219**	.215**	.437**	.221**	.198**	.300**	.242**	.184**	.205**	.898**	.899**	.899**	.901**	1	.898**	.899**	.898**	.900**	.897**	.846**	.845**	.843**	.843**	.903**	.846**	.846**	.844**	.847**	.839**	.861**	.861**	.864**	.862**	.923**	.859**	.865**	.861**	.862**	.861**
	6	.224**	.242**	.199**	.259**	.237**	.223**	.250**	.308**	.251**	.211**	.211**	.437**	.222**	.200**	.301**	.246**	.188**	.207**	.899**	.898**	.897**	.898**	.898**	1	.898**	.899**	.899**	.895**	.841**	.842**	.840**	.841**	.841**	.900**	.844**	.840**	.842**	.838**	.862**	.860**	.865**	.862**	.865**	.921**	.864**	.861**	.863**	.863**
	7	.225**	.243**	.199**	.258**	.237**	.227**	.250**	.313**	.256**	.211**	.211**	.441**	.224**	.208**	.307**	.251**	.191**	.212**	.897**	.897**	.897**	.898**	.899**	.898**	1	.899**	.898**	.896**	.843**	.843**	.842**	.841**	.843**	.840**	.907**	.843**	.845**	.842**	.861**	.862**	.864**	.860**	.865**	.861**	.923**	.860**	.861**	.861**
	8	.221**	.241**	.197**	.258**	.235**	.224**	.251**	.311**	.253**	.212**	.214**	.437**	.222**	.200**	.299**	.245**	.183**	.207**	.898**	.900**	.900**	.899**	.898**	.899**	.899**	1	.900**	.896**	.840**	.843**	.839**	.840**	.840**	.841**	.843**	.900**	.846**	.839**	.863**	.864**	.866**	.862**	.867**	.864**	.866**	.923**	.865**	.864**
	9	.223**	.242**	.200**	.259**	.236**	.229**	.251**	.315**	.257**	.215**	.216**	.439**	.219**	.200**	.305**	.248**	.185**	.213**	.899**	.898**	.898**	.899**	.900**	.899**	.898**	.900**	1	.899**	.847**	.845**	.842**	.841**	.844**	.842**	.846**	.845**	.906**	.841**	.865**	.864**	.865**	.861**	.866**	.863**	.865**	.862**	.925**	.862**
	10	.221**	.236**	.190**	.253**	.230**	.229**	.251**	.314**	.253**	.216**	.214**	.436**	.221**	.204**	.303**	.245**	.187**	.211**	.895**	.898**	.898**	.896**	.897**	.895**	.896**	.896**	.899**	1	.844**	.845**	.841**	.840**	.844**	.844**	.844**	.845**	.846**	.899**	.861**	.862**	.864**	.860**	.866**	.861**	.864**	.863**	.863**	.923**
Evaluate and design scientific enquiry	1	.200**	.206**	.161**	.229**	.206**	.226**	.239**	.317**	.259**	.205**	.204**	.398**	.173**	.146**	.284**	.230**	.163**	.185**	.901**	.846**	.843**	.843**	.846**	.841**	.843**	.840**	.847**	.844**	1	.871**	.871**	.870**	.872**	.871**	.867**	.869**	.872**	.869**	.905**	.851**	.846**	.847**	.847**	.850**	.842**	.845**	.845**	.847**
	2	.192**	.202**	.156**	.225**	.200**	.223**	.238**	.309**	.251**	.202**	.205**	.394**	.168**	.140**	.281**	.231**	.164**	.188**	.843**	.906**	.844**	.843**	.845**	.842**	.843**	.843**	.845**	.845**	.871**	1	.871**	.873**	.871**	.870**	.871**	.876**	.876**	.873**	.847**	.909**	.846**	.847**	.845**	.848**	.844**	.844**	.847**	.847**
	3	.188**	.193**	.152**	.215**	.192**	.217**	.233**	.305**	.245**	.196**	.199**	.391**	.168**	.145**	.271**	.221**	.157**	.179**	.838**	.843**	.901**	.841**	.843**	.840**	.842**	.839**	.842**	.841**	.871**	.871**	1	.871**	.870**	.868**	.873**	.869**	.870**	.870**	.845**	.847**	.906**	.846**	.845**	.845**	.844**	.843**	.844**	.845**
	4	.192**	.204**	.159**	.223**	.202**	.221**	.233**	.304**	.248**	.194**	.197**	.391**	.162**	.133**	.277**	.228**	.153**	.183**	.839**	.843**	.843**	.899**	.843**	.841**	.841**	.840**	.841**	.840**	.870**	.873**	.871**	1	.867**	.867**	.871**	.871**	.872**	.871**	.848**	.850**	.846**	.907**	.846**	.848**	.843**	.845**	.843**	.846**
	5	.189**	.195**	.150**	.216**	.191**	.220**	.236**	.305**	.246**	.196**	.199**	.397**	.166**	.144**	.280**	.225**	.158**	.179**	.842**	.843**	.844**	.840**	.903**	.841**	.843**	.840**	.844**	.844**	.872**	.871**	.870**	.867**	1	.871**	.872**	.869**	.870**	.871**	.848**	.848**	.848**	.845**	.908**	.847**	.842**	.845**	.844**	.845**
	6	.192**	.197**	.155**	.219**	.196**	.228**	.235**	.311**	.250**	.197**	.200**	.396**	.168**	.135**	.276**	.229**	.162**	.185**	.838**	.844**	.841**	.842**	.846**	.900**	.840**	.841**	.842**	.844**	.871**	.870**	.868**	.867**	.871**	1	.870**	.870**	.873**	.869**	.848**	.850**	.847**	.847**	.843**	.908**	.844**	.846**	.846**	.847**
	7	.203**	.208**	.167**	.229**	.207**	.220**	.232**	.304**	.251**	.196**	.197**	.405**	.175**	.153**	.290**	.240**	.174**	.194**	.841**	.844**	.845**	.844**	.846**	.844**	.907**	.843**	.846**	.844**	.867**	.871**	.873**	.871**	.872**	.870**	1	.868**	.871**	.868**	.848**	.851**	.847**	.846**	.846**	.849**	.906**	.847**	.847**	.847**
	8	.179**	.194**	.149**	.212**	.190**	.223**	.234**	.306**	.247**	.197**	.201**	.387**	.163**	.139**	.271**	.221**	.155**	.179**	.842**	.843**	.845**	.841**	.844**	.840**	.843**	.900**	.845**	.845**	.869**	.876**	.869**	.871**	.869**	.870**	.868**	1	.875**	.866**	.844**	.847**	.845**	.844**	.842**	.846**	.842**	.900**	.844**	.844**
	9	.196**	.202**	.159**	.227**	.201**	.221**	.230**	.306**	.247**	.197**	.198**	.396**	.169**	.140**	.279**	.231**	.161**	.191**	.845**	.847**	.847**	.845**	.847**	.842**	.845**	.846**	.906**	.846**	.872**	.876**	.870**	.872**	.870**	.873**	.871**	.875**	1	.869**	.853**	.851**	.852**	.847**	.849**	.852**	.845**	.846**	.911**	.849**
	10	.186**	.195**	.147**	.218**	.195**	.216**	.225**	.304**	.243**	.188**	.190**	.390**	.164**	.142**	.277**	.229**	.160**	.181**	.839**	.841**	.841**	.837**	.839**	.838**	.842**	.839**	.841**	.899**	.869**	.873**	.870**	.871**	.871**	.869**	.868**	.866**	.869**	1	.846**	.848**	.849**	.847**	.845**	.848**	.843**	.844**	.844**	.907**
Interpret data and evidence scientifically	1	.209**	.216**	.175**	.240**	.215**	.228**	.243**	.316**	.252**	.208**	.206**	.414**	.187**	.157**	.285**	.232**	.168**	.192**	.923**	.864**	.862**	.862**	.861**	.862**	.861**	.863**	.865**	.861**	.905**	.847**	.845**	.848**	.848**	.848**	.848**	.844**	.853**	.846**	1	.893**	.892**	.892**	.893**	.893**	.889**	.890**	.892**	.892**
	2	.203**	.214**	.168**	.236**	.210**	.219**	.242**	.310**	.251**	.207**	.209**	.413**	.182**	.160**	.284**	.230**	.165**	.192**	.862**	.922**	.862**	.864**	.861**	.860**	.862**	.864**	.864**	.862**	.851**	.909**	.847**	.850**	.848**	.850**	.851**	.847**	.851**	.848**	.893**	1	.894**	.892**	.893**	.894**	.892**	.893**	.894**	.893**
	3	.210**	.217**	.177**	.241**	.216**	.222**	.244**	.312**	.247**	.206**	.205**	.416**	.192**	.167**	.287**	.236**	.174**	.198**	.864**	.864**	.927**	.865**	.864**	.865**	.864**	.866**	.865**	.864**	.846**	.846**	.906**	.846**	.848**	.847**	.847**	.845**	.852**	.849**	.892**	.894**	1	.893**	.894**	.893**	.894**	.891**	.894**	.893**
	4	.199**	.208**	.165**	.228**	.204**	.216**	.238**	.306**	.245**	.198**	.201**	.408**	.182**	.160**	.278**	.229**	.164**	.188**	.862**	.863**	.862**	.922**	.862**	.862**	.860**	.862**	.861**	.860**	.847**	.847**	.846**	.907**	.845**	.847**	.846**	.844**	.847**	.847**	.892**	.892**	.893**	1	.892**	.890**	.890**	.893**	.889**	.889**
	5	.196**	.206**	.163**	.226**	.202**	.216**	.238**	.305**	.245**	.200**	.195**	.412**	.190**	.161**	.283**	.232**	.168**	.189**	.867**	.865**	.865**	.866**	.923**	.865**	.865**	.867**	.866**	.866**	.847**	.845**	.845**	.846**	.908**	.843**	.846**	.842**	.849**	.845**	.893**	.893**	.894**	.892**	1	.893**	.892**	.892**	.891**	.893**
	6	.204**	.213**	.172**	.237**	.212**	.220**	.243**	.308**	.247**	.204**	.205**	.417**	.187**	.161**	.290**	.240**	.175**	.198**	.863**	.862**	.862**	.861**	.859**	.921**	.861**	.864**	.863**	.861**	.850**	.848**	.845**	.848**	.847**	.908**	.849**	.846**	.852**	.848**	.893**	.894**	.893**	.890**	.893**	1	.891**	.890**	.891**	.891**
	7	.206**	.215**	.174**	.237**	.214**	.225**	.252**	.314**	.255**	.214**	.211**	.414**	.191**	.167**	.286**	.234**	.171**	.193**	.864**	.864**	.866**	.866**	.865**	.864**	.923**	.866**	.865**	.864**	.842**	.844**	.844**	.843**	.842**	.844**	.906**	.842**	.845**	.843**	.889**	.892**	.894**	.890**	.892**	.891**	1	.890**	.891**	.889**
	8	.207**	.219**	.176**	.240**	.215**	.213**	.237**	.305**	.241**	.201**	.200**	.417**	.184**	.166**	.287**	.236**	.172**	.197**	.860**	.862**	.862**	.863**	.861**	.861**	.860**	.923**	.862**	.863**	.845**	.844**	.843**	.845**	.845**	.846**	.847**	.900**	.846**	.844**	.890**	.893**	.891**	.893**	.892**	.890**	.890**	1	.891**	.890**
	9	.210**	.222**	.179**	.243**	.218**	.225**	.247**	.314**	.252**	.210**	.210**	.415**	.190**	.162**	.283**	.230**	.167**	.193**	.865**	.864**	.864**	.864**	.862**	.863**	.861**	.865**	.925**	.863**	.845**	.847**	.844**	.843**	.844**	.846**	.847**	.844**	.911**	.844**	.892**	.894**	.894**	.889**	.891**	.891**	.891**	.891**	1	.890**
	10	.199**	.208**	.164**	.229**	.206**	.219**	.236**	.310**	.246**	.201**	.200**	.410**	.182**	.156**	.281**	.231**	.166**	.193**	.861**	.862**	.863**	.862**	.861**	.863**	.861**	.864**	.862**	.923**	.847**	.847**	.845**	.846**	.845**	.847**	.847**	.844**	.849**	.907**	.892**	.893**	.893**	.889**	.893**	.891**	.889**	.890**	.890**	1
